# Supplementary material for: A dual-mode wearable sensor with electrophysiological and pressure sensing for cuffless blood pressure monitoring
Source: Royal Society of Chemistry journal article supplement (doi:10.1039/d4tc02494j), 2024-01-01
Supplement: d4tc02494j2.pdf [file d4tc02494j2.pdf]

## Supporting information

### **A Dual-Mode Wearable Sensor with Electrophysiology and Pressure Sensing for Cuffless Blood Pressure Monitoring**

Nan Jiang,<sup>‡</sup> Gangsheng Chen,<sup>‡</sup> Fan Zhou, Biao Ma,\* Chao Zhao\* and Hong Liu\*

State Key Laboratory of Digital Medical Engineering, School of Biological Science and Medical Engineering, Southeast University, Nanjing 210096, China

E-mail: [biaom@seu.edu.cn](mailto:biaom@seu.edu.cn); [czhao@seu.edu.cn](mailto:czhao@seu.edu.cn); [liuh@seu.edu.cn](mailto:liuh@seu.edu.cn)

<sup>‡</sup> These authors contributed equally to this work.

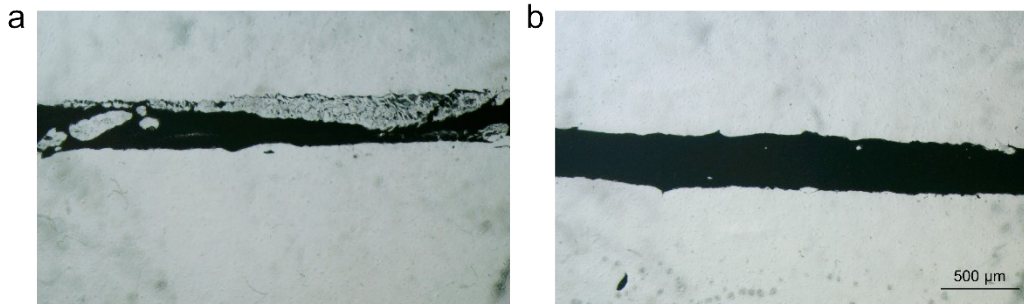

**Fig. S1** Photo of the liquid metal circuit made by (a) blade coating and (b) magnetic printing method.

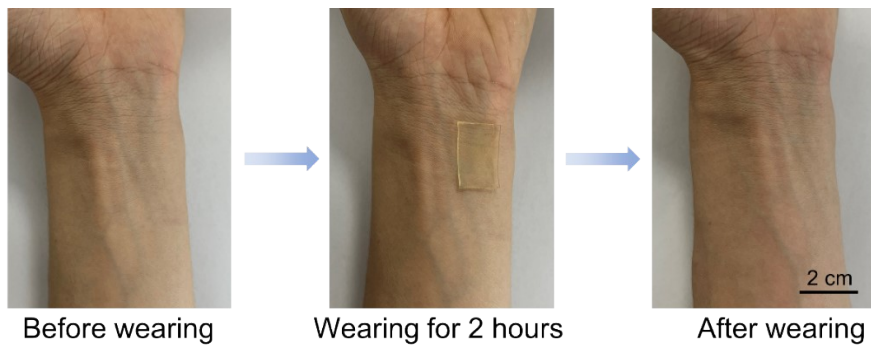

**Fig. S2** Photos showing the skin state before and after wearing the ionogel for 2 hours.

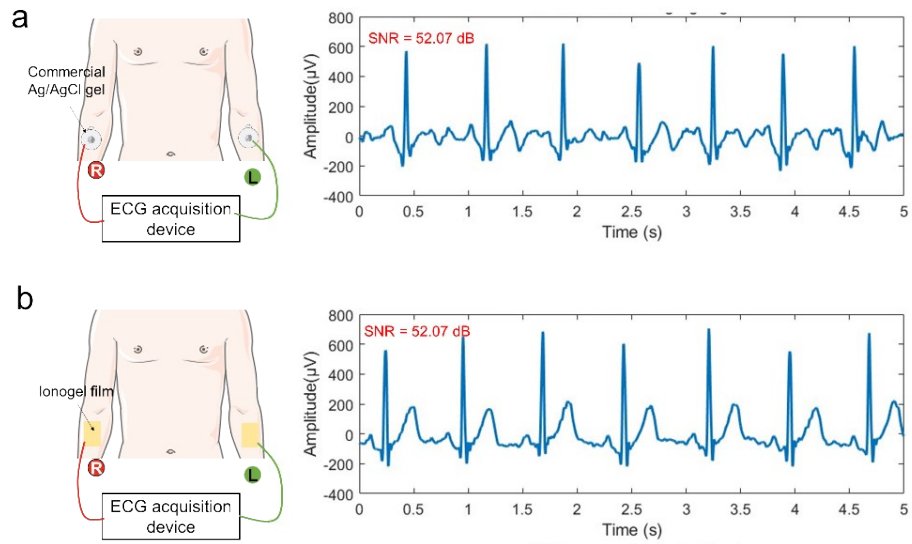

**Fig. S3** ECG signals were collected using (a) ionogels and (b) commercial Ag/AgCl gel electrodes.

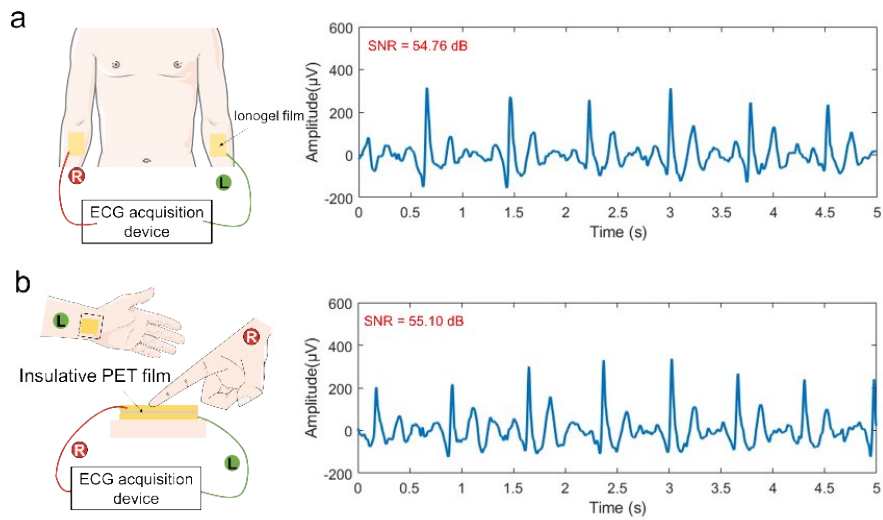

**Fig. S4** ECG signals were collected by wearing the ionogel films on two arms (a) and (b) the left wrist with the right finger contacting the the top ionogel film.

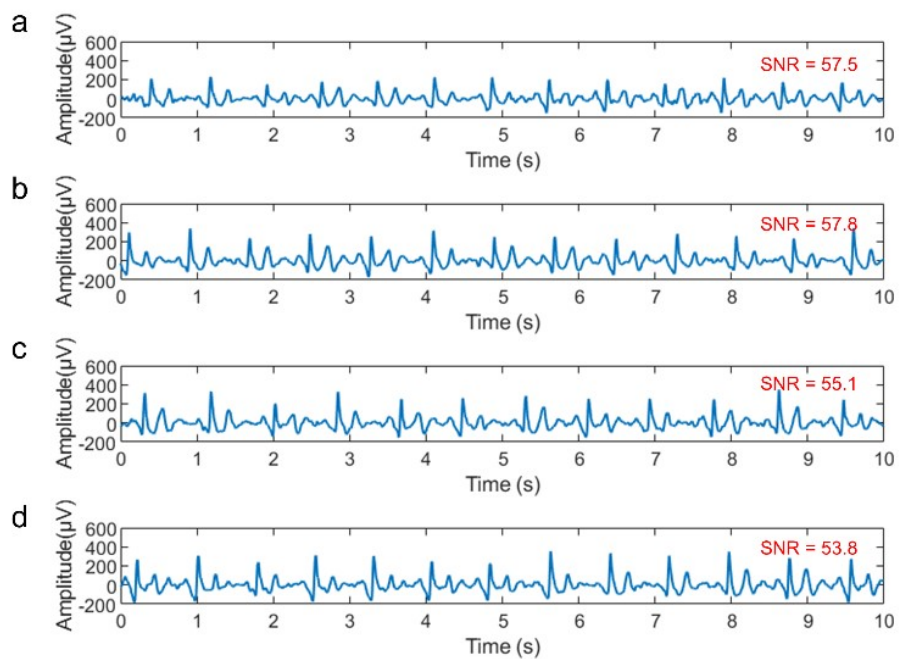

**Fig. S5** ECG signals were collected after wearing ionogels for (a) 0, (b) 2, (c) 4, and (d) 6 hours.

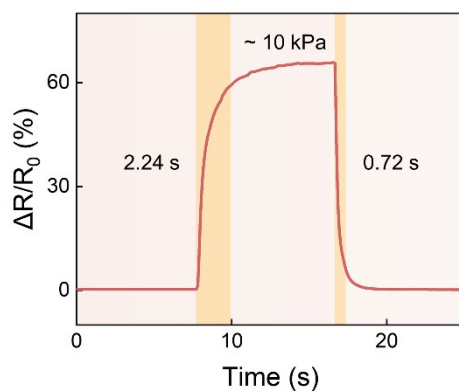

**Fig. S6** Response and recovery time for 90 % resistance change under pressure of 10 kPa.

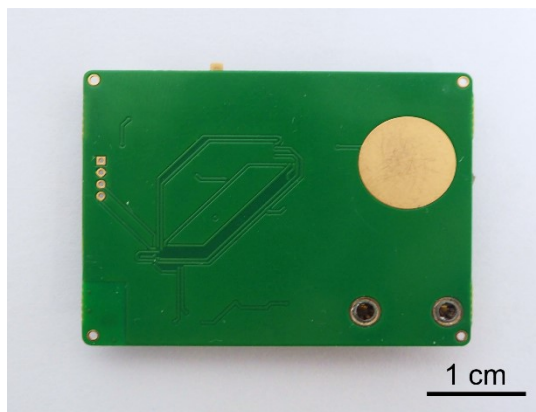

**Fig. S7** Photos showing the back of the PCB board.

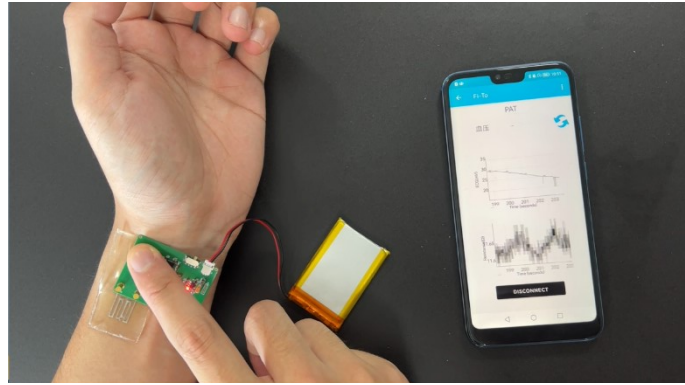

**Fig. S8** Photograph showing the simultaneous detection of both the pulse and ECG signals and wireless signal transmission based on Bluetooth.

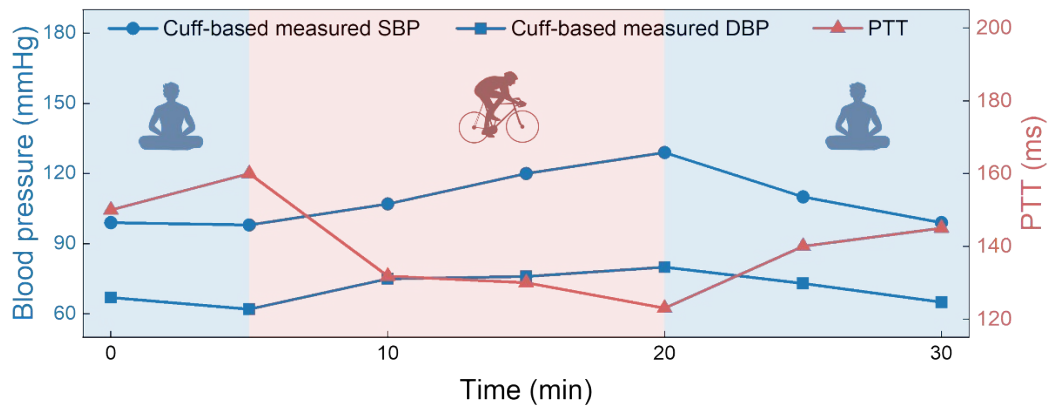

**Fig. S9** Blood pressure was measured by a commercial sphygmomanometer and PTT was collected by the dual-mode sensing system during rest and exercise states.

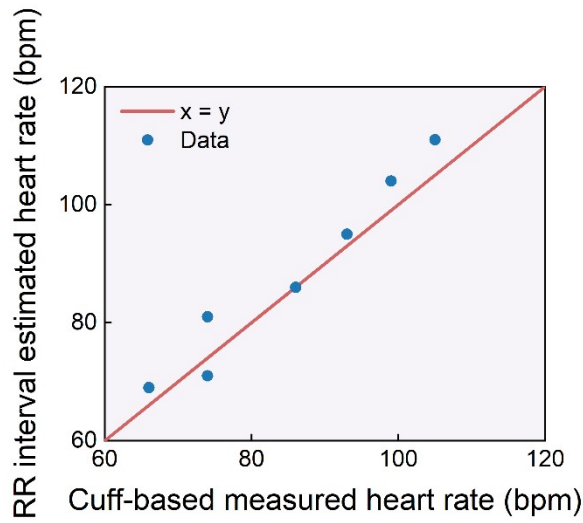

**Fig. S10** Results of regression analysis between measured and estimated values of the heart rate.

**Table 1.** Comparison of continuous BP monitoring devices.

| Methods                              | Accuracy   |      |            |      | Sensors                                                                                                            | Signal transmission | Wearable mode                                                                                                                |
|--------------------------------------|------------|------|------------|------|--------------------------------------------------------------------------------------------------------------------|---------------------|------------------------------------------------------------------------------------------------------------------------------|
|                                      | DBP (mmHg) |      | SBP (mmHg) |      |                                                                                                                    |                     |                                                                                                                              |
|                                      | ME         | SD   | ME         | SD   |                                                                                                                    |                     |                                                                                                                              |
| PPG+ECG <sup>1</sup>                 | 3.23       | 4.75 | 4.43       | 6.09 | Commercial PPG sensor and ECG electrodes.                                                                          | Wired               | PPG sensor was worn on one finger and ECG electrodes were placed on two wrists and an ankle.                                 |
| Bioimpedance <sup>2</sup>            | 0.2        | 4.5  | 0.2        | 5.8  | Graphene electronic tattoos as human bioelectronic interfaces                                                      | Wired               | Three tattoo pairs were placed onto the wrist over the radial and ulnar arteries, both branching out of the brachial artery. |
| Pulse at one position <sup>3</sup>   | -0.89      | 6.19 | -0.32      | 5.28 | Perovskite structure Pb(Zr <sub>0.52</sub> Ti <sub>0.48</sub> )O <sub>3</sub> based piezoelectric pressure sensor. | Wireless            | A pulse sensor was worn on one wrist.                                                                                        |
| Pulses at two positions <sup>4</sup> | 0.11       | 3.68 | -0.05      | 4.61 | Lead zirconate titanate based piezoelectric pressure sensor.                                                       | Wireless            | A wristband was worn on one wrist.                                                                                           |
| This work                            | 0.0        | 1.52 | 0.0        | 2.98 | Dual-mode sensor composed of ionogel embedded LM circuit                                                           | Wireless            | A dual-mode sensor were worn on one wrist.                                                                                   |

### Supplementary References

- 1 S. Yang, Y. Zhang, S.-Y. Cho, R. Correia and S. P. Morgan, *Opt. Quantum Electron.*, 2021, **53**, 93.
- 2 D. Kireev, K. Sel, B. Ibrahim, N. Kumar, A. Akbari, R. Jafari and D. Akinwande, *Nat. Nanotechnol.*, 2022, **17**, 864–870.
- 3 S. Min, D. H. Kim, D. J. Joe, B. W. Kim, Y. H. Jung, J. H. Lee, B.-Y. Lee, I. Doh, J. An, Y.-N. Youn, B. Joung, C. D. Yoo, H.-S. Ahn and K. J. Lee, *Adv. Mater.*, 2023, **35**, 2301627.
- 4 Li, H. Jia, J. Zhou, X. Huang, L. Xu, S. Jia, Z. Gao, K. Yao, D. Li, B. Zhang, Y. Liu, Y. Huang, Y. Hu, G. Zhao, Z. Xu, J. Li, C. K. Yiu, Y. Gao, M. Wu, Y. Jiao, Q. Zhang, X. Tai, R. H. Chan, Y. Zhang, X. Ma and X. Yu, *Nat. Commun.*, 2023, **14**, 5009.
